# Supplementary material for: Pulsed valve matrix-assisted ionization
Source: Royal Society of Chemistry journal article supplement (doi:10.1039/c7an00489c), 2017-01-01
Supplement: c7an00489c1.pdf [file c7an00489c1.pdf]

## Pulsed Valve Matrix-assisted Ionization

Bijay Banstola and Kermit K. Murray

*Department of Chemistry*  
*Louisiana State University*  
*Baton Rouge, Louisiana, 70803,*  
*USA*

Supplementary Information

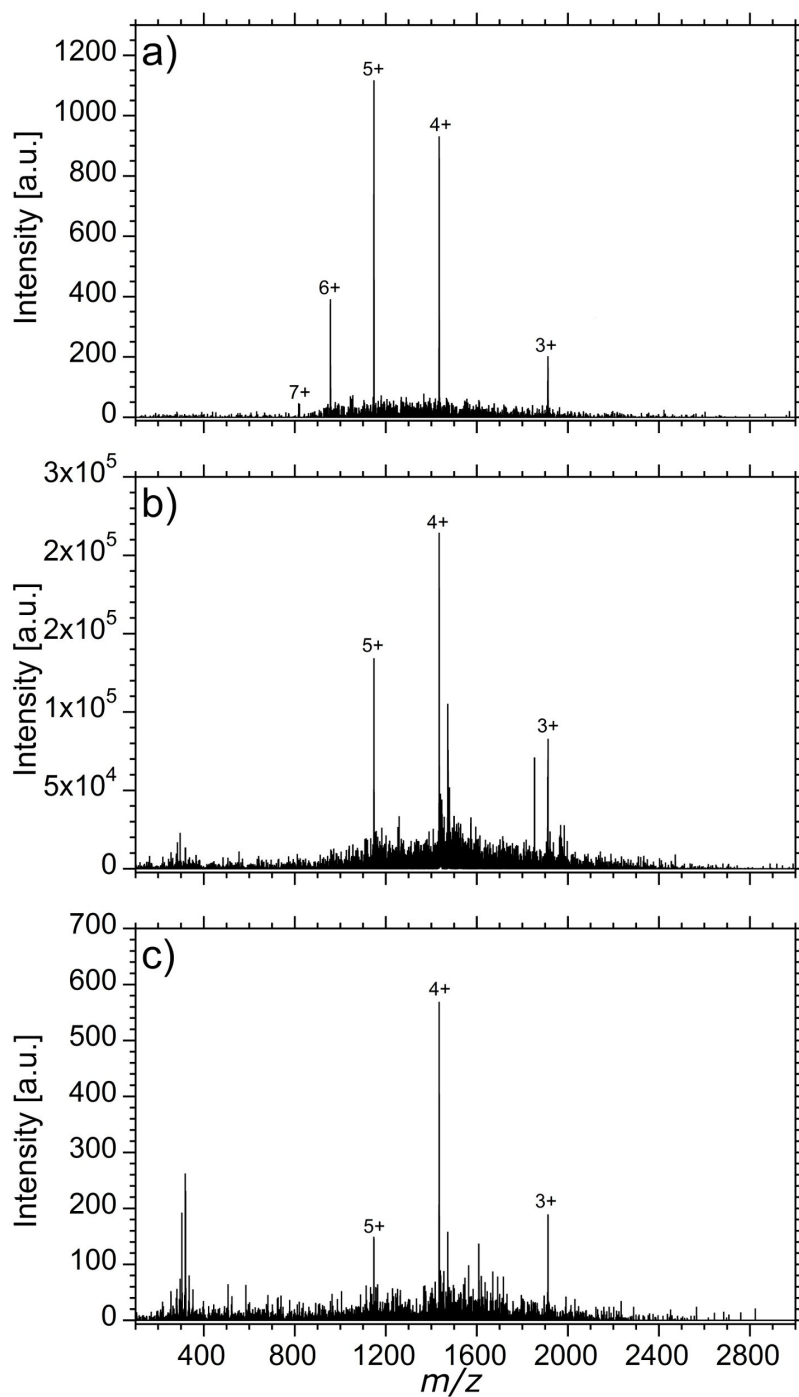

**Figure S1.** Pulsed valve matrix-assisted ionization mass spectra of insulin obtained with matrices a) 2-NPG, b) 3-NBN and c) 2,5-DHAP using 5 pulses at 1 Hz repetition.

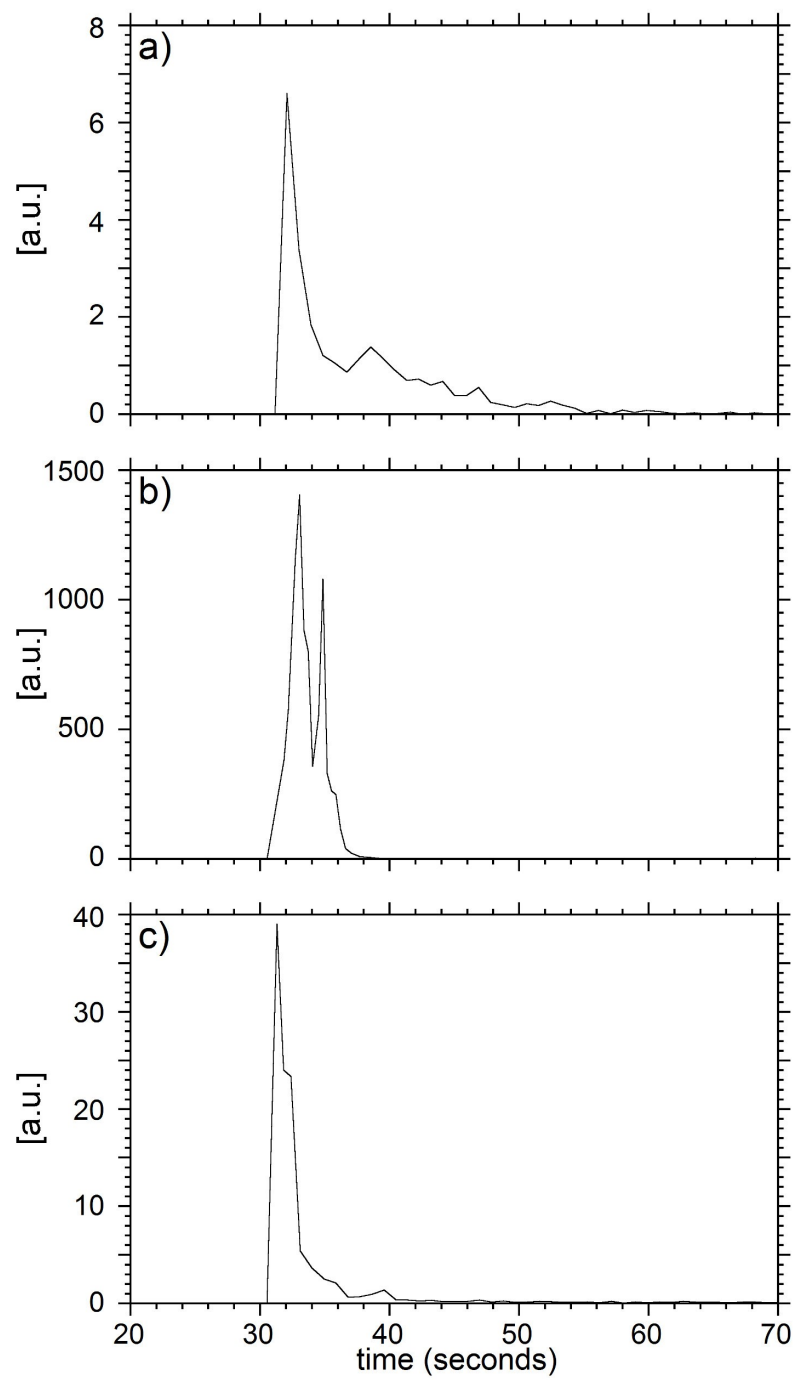

**Figure S2.** Total ion current as a function of time for pulsed valve matrix-assisted ionization of a) 2-NPG, b) 3-NBN and c) 2,5- DHAP using 5 pulses at 1 Hz repetition rate.
